# Supplementary material
Source: PubMed Central journal article supplement (PMC2546554)
Supplement: M802800200_1.pdf [file M802800200_1.pdf]

# Supplemental Figure 1

**A**

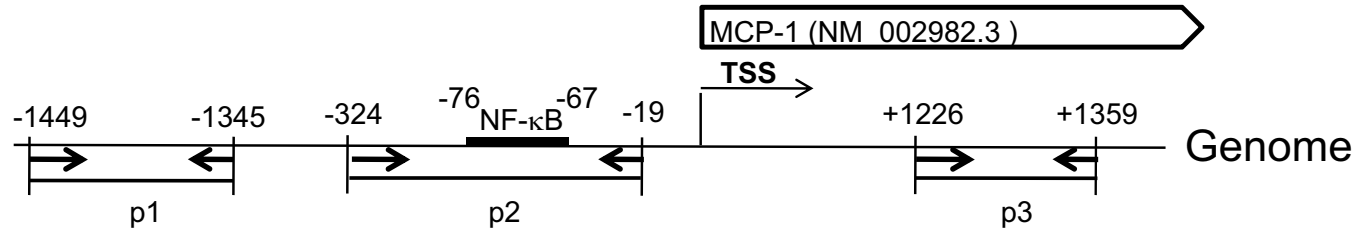

**B**

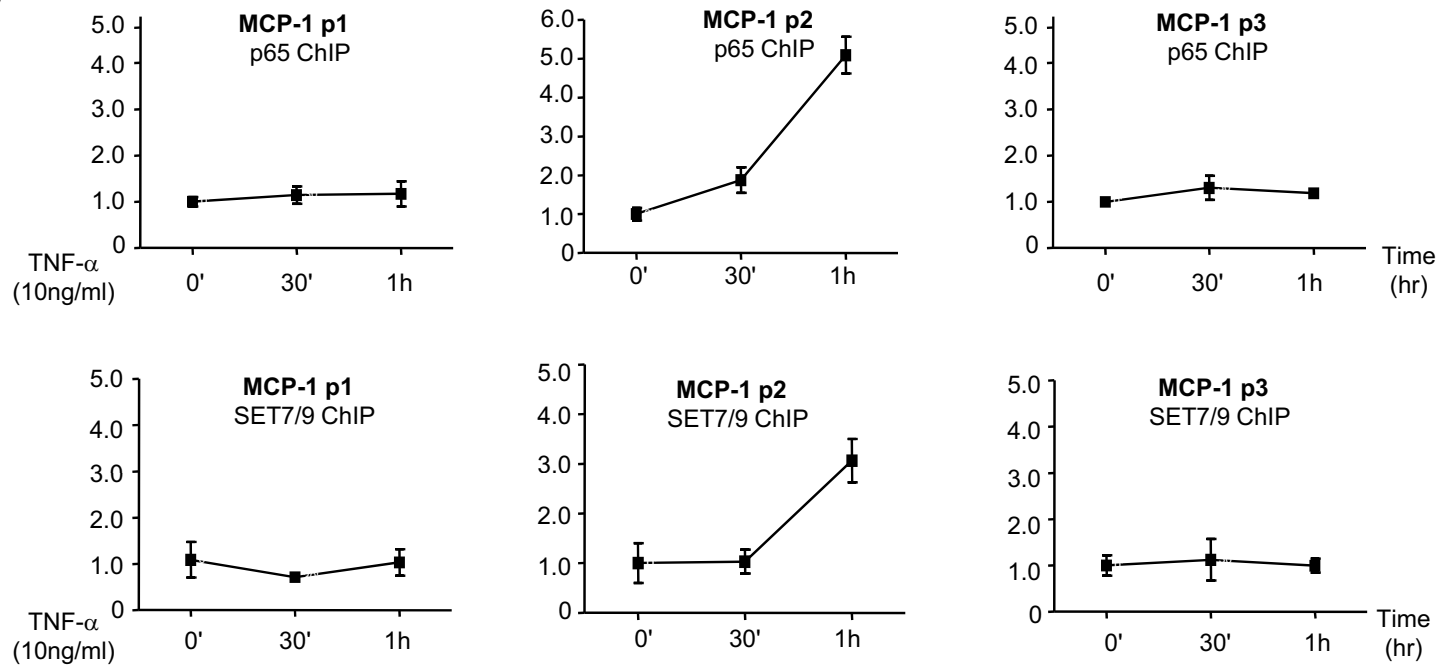

# Supplemental Figure 2

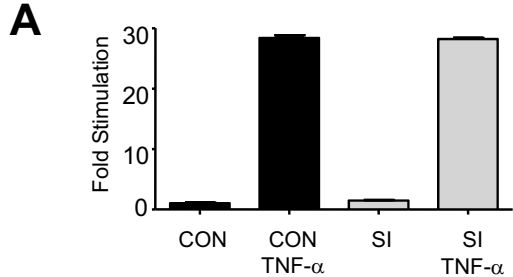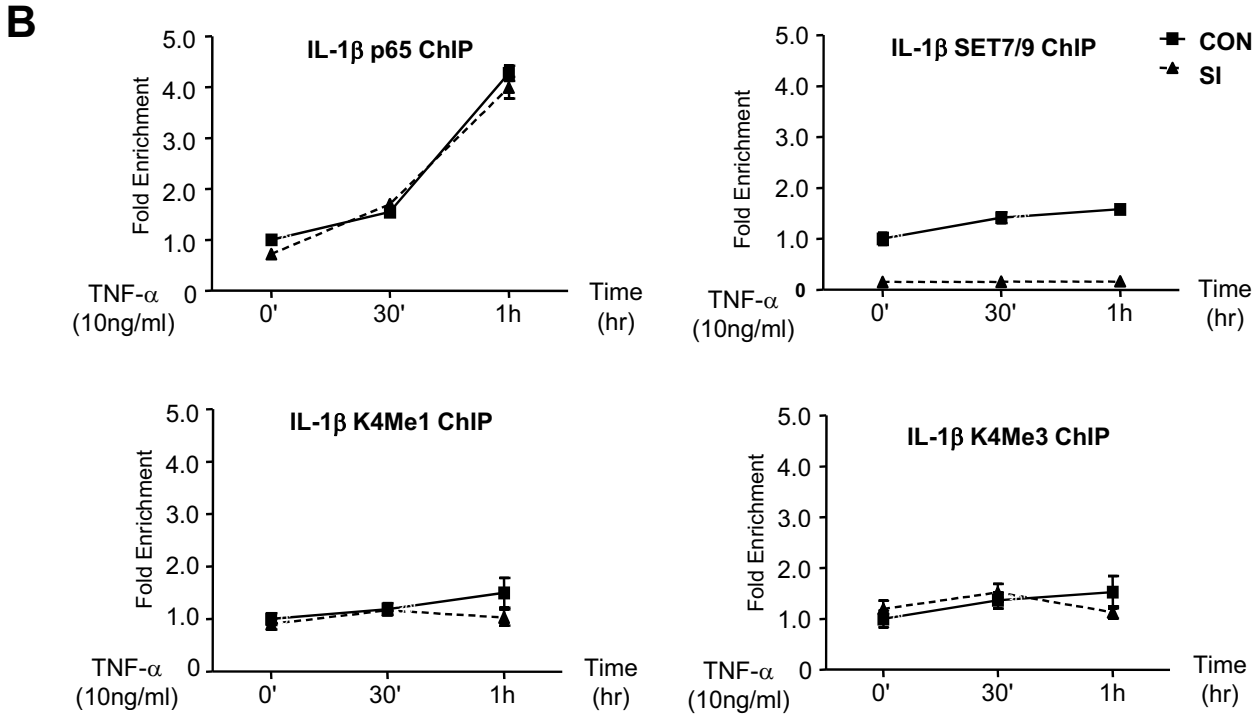

**Table S1.** Primers sequences for cDNA Expression Analysis.

|                            | Gene                           | Forward Primer Sequence            | Reverse Primer Sequence            |
|----------------------------|--------------------------------|------------------------------------|------------------------------------|
| Primers for RT-PCR or qPCR | MCP-1                          | CTTCGGAGTTTGGGTTTG<br>CTTGTC       | AGTCTCTGCCGCCCTTCT<br>GTG          |
|                            | TNF- $\alpha$                  | GGGCTCCAGGCGGTGCT<br>TGTTCC        | GACGGCGATGCGGCTGA<br>TGGT          |
|                            | IL-8                           | AGGGTTGCCAGATGCAAT<br>AC           | GCAAACCCATTCAATTCC<br>TG           |
|                            | IL1 $\beta$                    | CGACACCCTCGTTATCCC<br>ATGTGTCG     | CTCCGACCACCACTACA<br>GCAAG         |
|                            | JMJD-3                         | CGCAACTACTGCAACGA<br>GTGCG         | AGCGTGAAGGCGTCGTA<br>GG            |
|                            | BMP-2                          | CGGTGCAATAGCAGTTTC<br>CATCACCG     | CCACCTGCTTGCATTCTG<br>ATTC         |
|                            | IRAK-2                         | CGGTTGTAAGTCCTTCAG<br>GTAAACCG     | CCGCGTATCTGCCAGAG<br>GAT           |
|                            | PTX-3                          | GACCAAAAGACTCAAGC<br>CTCATTGGTC    | TTATTCCCAATGCGTTCC<br>AAGA         |
|                            | TNFAIP6                        | CGGATCATTATTGATTATG<br>GAATCCG     | TGTGCCAGTAGCAGATT<br>GGTTA         |
|                            | ICAM-1                         | CGGCATTACTGCACACGT<br>CAGCCG       | GTTCCCTGGACGGGCTG<br>TTC           |
| ChIP assay primers         | MCP-1 p1                       | CACTAACTGAGGCCATG<br>AACAGGTTAGTG  | GCAAACCAGCACAAATG<br>TAGCC         |
|                            | MCP-1 p2                       | TTGGAATGTGGCCTGAA<br>GGT           | AGGGTTATTTTAAAGGAT<br>TCTGCTTTC    |
|                            | MCP-1 p3                       | CGTTCTGGGAGCTAGAG<br>GAGGAACG      | CTCTCCACCTGGGTGCCT<br>ATTC         |
|                            | TNF- $\alpha$                  | AACCGAGACAGAAGGTG<br>CAG           | TGTGCCAACAACCTGCCT<br>TTA          |
|                            | IL-1 $\beta$                   | ATAGTTTGCTACTCCTTG<br>CCCTTCCATGAA | GCCAGTTTCTCCCTCGCT<br>GTTTTTATGGCT |
| EMSA assay oligos          | MCP-1 promoter                 | ACTCATGGAAGATCCCTC<br>CT           | AGGAGGGATCTTCCATG<br>AGT           |
|                            | NF- $\kappa$ B consensus oligo | AGTTGAGGGGACTTTCA<br>GGA           | TCCTGAAAGTCCCCTCA<br>ACT           |

## SUPPLEMENTARY FIGURE LEGENDS

**Supplemental Figure 1. Specificity of MCP-1 promoter primer pairs for ChIP assays.** *A.* Locations of MCP-1 promoter primer pairs (p1-p3) used in this study. *B.* ChIP-qPCRs shows that recruitment of p65 and SET7/9 can only be observed using the MCP-1 promoter primer pair p2 encompassing the NF- $\kappa$ B binding sites.

**Supplemental Figure 2. SET7/9 does not regulate IL-1 $\beta$  expression.** *A.* IL-1 $\beta$  induction by TNF- $\alpha$  treatment in THP-1 cells is not affected by SET7/9 depletion (data from RT-qPCR). *B.* No evident SET7/9 recruitment or H3K4 methylation (mono- or tri-) can be observed by ChIP-qPCR on the IL-1 $\beta$  promoter upon TNF- $\alpha$  treatment. On the other hand, significant p65 recruitment can be detected which is not affected by SET7/9 depletion. Thus the co-activator effects of SET7/9 are promoter-specific.
